# Supplementary material
Source: PubMed Central journal article supplement (PMC7138460)
Supplement: NIHMS1551725-supplement-Supplemental_Digital_Content_1.pdf [file NIHMS1551725-supplement-Supplemental_Digital_Content_1.pdf]

**Appendix 1. Median Daily Micronutrient Intakes From Dietary Supplements Alone Among Users of Dietary Supplements Containing the Specified Nutrient, by Pregnancy and Lactation Status in the United States, NHANES 1999–2014**

|                  | Pregnant women<br>(n=1,314) |        |         | Lactating women<br>(n=297) |        |         | Non-pregnant and<br>non-lactating women (n=8,096) |        |         |      |
|------------------|-----------------------------|--------|---------|----------------------------|--------|---------|---------------------------------------------------|--------|---------|------|
|                  | n*                          | Median | RDA     | n                          | Median | RDA     | n                                                 | Median | RDA     | UL   |
| Thiamin (mg)     | 743                         | 1.8    | 1.4     | 162                        | 1.8    | 1.4     | 2,065                                             | 1.5    | 1.1     | ND   |
| Riboflavin (mg)  | 743                         | 1.7    | 1.4     | 162                        | 1.7    | 1.6     | 2,066                                             | 1.7    | 1.1     | ND   |
| Niacin (mg)      | 742                         | 19.8   | 18      | 163                        | 19.5   | 17      | 2,122                                             | 17.5   | 14      | 35   |
| Vitamin B6 (mg)  | 772                         | 2.6    | 1.9     | 166                        | 2.6    | 2.0     | 2,219                                             | 2.0    | 1.3     | 100  |
| Folic acid (µg)‡ | 786                         | 786    | 360     | 167                        | 782    | 300     | 2,196                                             | 399    | 240     | 1000 |
| Vitamin B12 (µg) | 746                         | 7.7    | 2.6     | 163                        | 7.8    | 2.8     | 2,249                                             | 6.0    | 2.4     | ND   |
| Vitamin C (mg)   | 775                         | 99.2   | 85      | 167                        | 99.0   | 120     | 2,419                                             | 59.7   | 75      | 2000 |
| Vitamin D (µg)   | 763                         | 9.8    | 15      | 170                        | 9.8    | 15      | 2,273                                             | 10.0   | 15      | 100  |
| Choline (mg)     | 49                          | 9.8    | 450§    | 18                         | 8.3    | 550§    | 361                                               | 8.8    | 425§    | 3500 |
| Calcium (mg)     | 756                         | 197    | 1,000   | 168                        | 193    | 1,000   | 2,475                                             | 197    | 1000    | 2500 |
| Iodine (µg)      | 219                         | 141    | 220     | 46                         | 108    | 290     | 1,214                                             | 119    | 150     | 1100 |
| Iron (mg)        | 777                         | 27.5   | 27      | 166                        | 26.9   | 9       | 1,920                                             | 17.4   | 18      | 45   |
| Magnesium (mg)   | 297                         | 47.0   | 350/360 | 67                         | 42.1   | 310/320 | 1,834                                             | 49.8   | 310/320 | 350  |
| Phosphorous (mg) | 65                          | 99.8   | 700     | 16                         | 72.0   | 700     | 864                                               | 70.1   | 700     | 4000 |
| Selenium (µg)    | 108                         | 20.0   | 60      | 34                         | 19.1   | 70      | 1,424                                             | 20.0   | 55      | 400  |
| Zinc (mg)        | 709                         | 20.8   | 11      | 160                        | 23.2   | 12      | 2,023                                             | 12.0   | 8       | 40   |

NHANES, National Health and Nutrition Examination Survey; ND, Not Determined; RDA, Recommended Dietary Allowances; UL, Tolerable Upper Intake Level.

\* Unweighted sample size of those who consumed dietary supplements containing a specific nutrient.

† Nutrient intake from dietary supplements could not be calculated if information on the number of servings consumed or the number of days taken was missing.

‡ In µg folic acid. The RDAs that were presented as µg of dietary folate equivalents were converted to µg of folic acid based on the equation set by the National Academies of Sciences, Engineering, and Medicine, 1 µg of dietary folate equivalents = 0.6 µg of folic acid with meals. The UL only applies to folic acid consumed via fortified food or dietary supplements.

§ Denotes the Adequate Intakes; unless otherwise noted the RDA is presented.

|| Magnesium requirement differs based on age; 350 mg for 19-30y and 360 mg for 31-50y.

Jun S, Gahche JJ, Potischman N, Dwyer JT, Guenther PM, Sauder KA, et al. Dietary supplement use and its micronutrient contribution during pregnancy and lactation in the United States. *Obstet Gynecol* 2020;135.

The authors provided this information as a supplement to their article.

©2020 American College of Obstetricians and Gynecologists.

**Appendix 2. Percentages of Women (20-44y) Using Specified Types Of Dietary Supplements Over Time, by Pregnancy and Lactation Status in the United States, NHANES 1999–2014**

|                              | <b>1999-2002<br/>(n=2,382)</b> | <b>2003-2006<br/>(n=2,340)</b> | <b>2007-2010<br/>(n=2,556)</b> | <b>2011-2014<br/>(n=2,429)</b> | <b>P-for linear trend</b> |
|------------------------------|--------------------------------|--------------------------------|--------------------------------|--------------------------------|---------------------------|
| Any supplement use           |                                |                                |                                |                                |                           |
| Pregnant                     | 79.6 ± 3.0                     | 79.3 ± 3.0                     | 76.7 ± 4.0                     | 71.9 ± 3.2                     | 0.072                     |
| Lactating                    | 81.9 ± 5.7                     | 56.4 ± 6.3                     | 68.0 ± 6.4                     | 74.4 ± 6.0                     | 0.677                     |
| NPNL                         | 47.2 ± 1.7                     | 46.7 ± 1.6                     | 40.5 ± 1.7                     | 45.1 ± 1.6                     | 0.096                     |
| Multi-vitamin-mineral use    |                                |                                |                                |                                |                           |
| Pregnant                     | 74.6 ± 3.8                     | 76.9 ± 3.2                     | 70.8 ± 4.9                     | 66.5 ± 4.6                     | 0.110                     |
| Lactating                    | 76.9 ± 6.0                     | 55.2 ± 6.4                     | 54.8 ± 7.4                     | 68.9 ± 6.5                     | 0.391                     |
| NPNL                         | 32.3 ± 1.3                     | 33.1 ± 1.3                     | 28.5 ± 1.4                     | 30.2 ± 1.6                     | 0.099                     |
| Single- or multi-vitamin use |                                |                                |                                |                                |                           |
| Pregnant                     | 8.5 ± 2.1                      | 10.0 ± 3.0                     | 11.6 ± 2.7                     | 16.3 ± 4.5                     | 0.107                     |
| Lactating                    | ES <sup>2</sup>                | ES <sup>2</sup>                | ES <sup>2</sup>                | ES <sup>2</sup>                | —                         |
| NPNL                         | 15.4 ± 1.1                     | 13.7 ± 1.2                     | 12.7 ± 1.0                     | 18.3 ± 0.9                     | 0.085                     |
| Single- or multi-mineral use |                                |                                |                                |                                |                           |
| Pregnant                     | 10.4 ± 2.0                     | 13.4 ± 2.8                     | ES <sup>2</sup>                | 8.8 ± 2.3                      | 0.449                     |
| Lactating                    | ES <sup>2</sup>                | ES <sup>2</sup>                | ES <sup>2</sup>                | 15.4 ± 4.6                     | —                         |
| NPNL                         | 9.2 ± 0.9                      | 9.0 ± 1.0                      | 6.4 ± 0.7                      | 6.7 ± 0.7                      | 0.009                     |
| Botanical use                |                                |                                |                                |                                |                           |
| Pregnant                     | ES <sup>2</sup>                | ES <sup>2</sup>                | ES <sup>2</sup>                | ES <sup>2</sup>                | —                         |
| Lactating                    | ES <sup>2</sup>                | 0 ± 0                          | ES <sup>2</sup>                | ES <sup>2</sup>                | —                         |
| NPNL                         | 7.2 ± 0.7                      | 5.4 ± 0.6                      | 3.9 ± 0.5                      | 6.2 ± 0.6                      | 0.011                     |
| Prenatal supplement use      |                                |                                |                                |                                |                           |
| Pregnant                     | 66.4 ± 2.4                     | 65.7 ± 3.5                     | 61.3 ± 5.3                     | 62.1 ± 4.8                     | 0.309                     |
| Lactating                    | 68.6 ± 5.9                     | 51.0 ± 6.5                     | 41.7 ± 7.9                     | 53.8 ± 7.0                     | 0.069                     |
| NPNL                         | 2.6 ± 0.5                      | 3.5 ± 0.5                      | 3.6 ± 0.5                      | 4.1 ± 0.6                      | 0.060                     |
| Folic acid-containing        |                                |                                |                                |                                |                           |
| Pregnant                     | 74.8 ± 3.6                     | 76.9 ± 3.7                     | 71.9 ± 5.1                     | 67.0 ± 4.5                     | 0.125                     |
| Lactating                    | 76.9 ± 6.0                     | 55.2 ± 6.4                     | 57.9 ± 6.8                     | 68.9 ± 6.5                     | 0.453                     |
| NPNL                         | 34.5 ± 1.5                     | 34.2 ± 1.5                     | 29.8 ± 1.4                     | 31.5 ± 1.5                     | 0.052                     |
| Iodine-containing            |                                |                                |                                |                                |                           |
| Pregnant                     | 24.1 ± 3.3                     | 21.2 ± 2.9                     | 15.2 ± 4.2                     | 18.3 ± 3.2                     | 0.114                     |
| Lactating                    | 22.6 ± 4.5                     | 11.8 ± 3.9                     | 17.9 ± 6.3                     | 17.7 ± 4.7                     | 0.689                     |
| NPNL                         | 23.4 ± 1.2                     | 19.5 ± 1.1                     | 15.7 ± 1.4                     | 14.6 ± 0.9                     | <0.001                    |
| Iron-containing              |                                |                                |                                |                                |                           |
| Pregnant                     | 75.0 ± 3.5                     | 73.9 ± 3.7                     | 72.8 ± 4.6                     | 65.3 ± 4.4                     | 0.089                     |
| Lactating                    | 77.8 ± 6.0                     | 56.4 ± 6.3                     | 56.3 ± 6.6                     | 67.9 ± 6.2                     | 0.275                     |
| NPNL                         | 31.9 ± 1.4                     | 30.3 ± 1.4                     | 26.0 ± 1.4                     | 25.2 ± 1.3                     | <0.001                    |

NHANES, National Health and Nutrition Examination Survey; NPNL, non-pregnant and non-lactating.

All estimates are percentage ± SE.

Estimate suppressed because relative standard error is greater than 30%.

Jun S, Gahche JJ, Potischman N, Dwyer JT, Guenther PM, Sauder KA, et al. Dietary supplement use and its micronutrient contribution during pregnancy and lactation in the United States. *Obstet Gynecol* 2020;135.

The authors provided this information as a supplement to their article.

©2020 American College of Obstetricians and Gynecologists.

**Appendix 3. Comparison of Sociodemographic Characteristics Between Younger (20-34y) and Older (35-44y) Pregnant Women in the United States, NHANES 1999–2014**

| <b>Characteristic</b>          | <b>Pregnant, 20-34y<br/>(n=1,159)</b> | <b>Pregnant, 35-44y<br/>(n=155)</b> | <b>P*</b> |
|--------------------------------|---------------------------------------|-------------------------------------|-----------|
| Race and ethnicity             |                                       |                                     | 0.07      |
| Non-Hispanic white             | 52.3 (2.7)                            | 61.4 (5.5)                          |           |
| Non-Hispanic black             | 17.7 (1.9)                            | 9.4 (2.6)                           |           |
| Hispanic                       | 20.5 (1.8)                            | 16.7 (3.5)                          |           |
| Education                      |                                       |                                     | <0.0001   |
| Less than high school          | 21.2 (1.8)                            | 8.9 (1.9)                           |           |
| High school graduate           | 20.2 (1.9)                            | 9.2 (2.6)                           |           |
| More than high school          | 58.7 (2.3)                            | 82.0 (3.1)                          |           |
| Family income                  |                                       |                                     | 0.0003    |
| PIR≤130%                       | 29.2 (2.1)                            | 16.2 (3.5)                          |           |
| PIR 131-350%                   | 36.5 (2.4)                            | 21.8 (4.7)                          |           |
| PIR>350%                       | 34.3 (2.8)                            | 62.1 (5.8)                          |           |
| Marital status                 |                                       |                                     | <0.0001   |
| Married or living with partner | 76.0 (2.2)                            | 91.4 (2.4)                          |           |
| Once married                   | 2.8 (0.5)                             | ES <sup>‡</sup>                     |           |
| Never married                  | 21.2 (2.1)                            | ES <sup>‡</sup>                     |           |

NHANES, National Health and Nutrition Examination Survey; PIR, family income-to-poverty ratio. All estimates are percentages ± SEs.

\* P-values were obtained from Satterthwaite-adjusted Wald Chi-square test.

† Race and ethnicity does not sum to 100% because the “other” race category is not presented.

‡ Estimate suppressed because of relative standard error is greater than 30%.
